# Supplementary material
Source: publisher site journal article supplement (https://www.dovepress.com/article/219854)

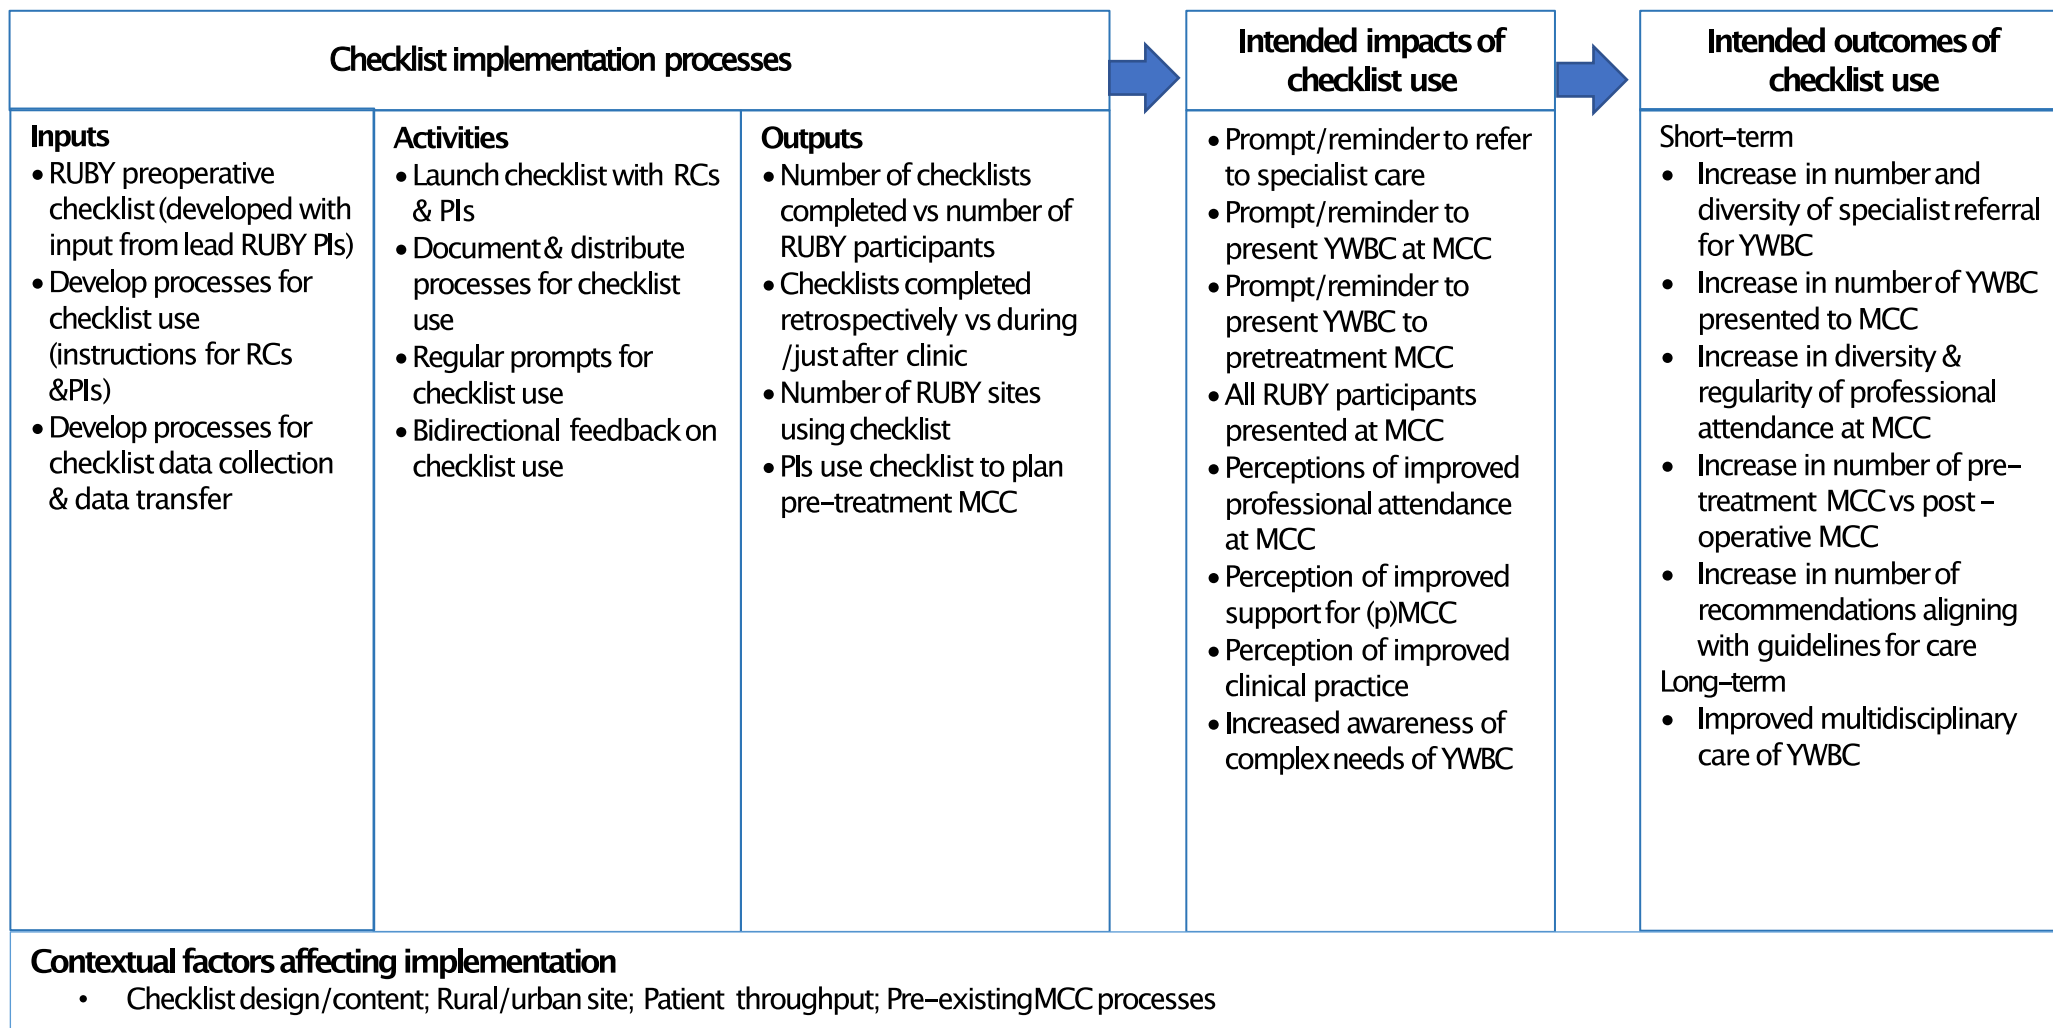

Appendix A: RUBY Multidisciplinary Cancer Conference (MCC) Checklist Evaluation Logic Model

Supplement: Supplementary file 1 [file get_supplementary_file.php]
